# Supplementary material for: Facile synthesis of core–shell magnetic-fluorescent nanoparticles for cell imaging
Source: Royal Society of Chemistry journal article supplement (doi:10.1039/c6ra08410a), 2016-01-01
Supplement: c6ra08410a1.pdf [file c6ra08410a1.pdf]

## Supporting Information

### Facile Synthesis of Core-shell Magnetic-fluorescent Nanoparticles for Cell Imaging

Zhuo Gao, Wenqing Huang, Yang Zheng, Yanjiao Lu, Shusen You, Jie Shen and Meizhen Yin\*

E-mail: yinmz@mail.buct.edu.cn

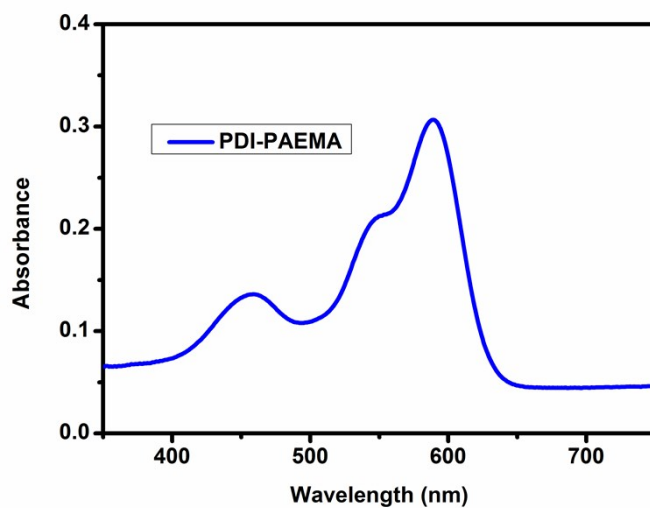

Figure S1. UV-vis absorption of PDI-PAEMA in water

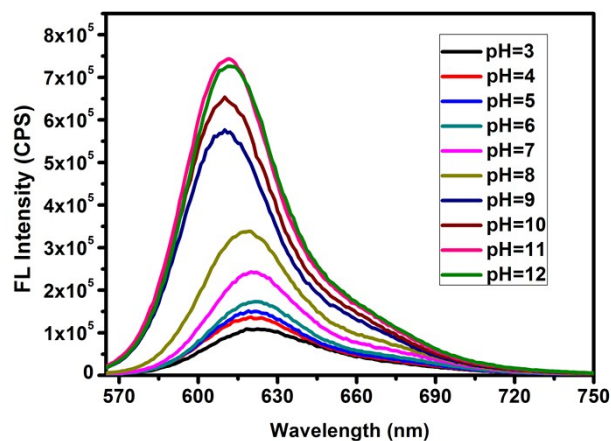

Figure S2. Fluorescence spectra of PDI-PAEMA in pH buffer.

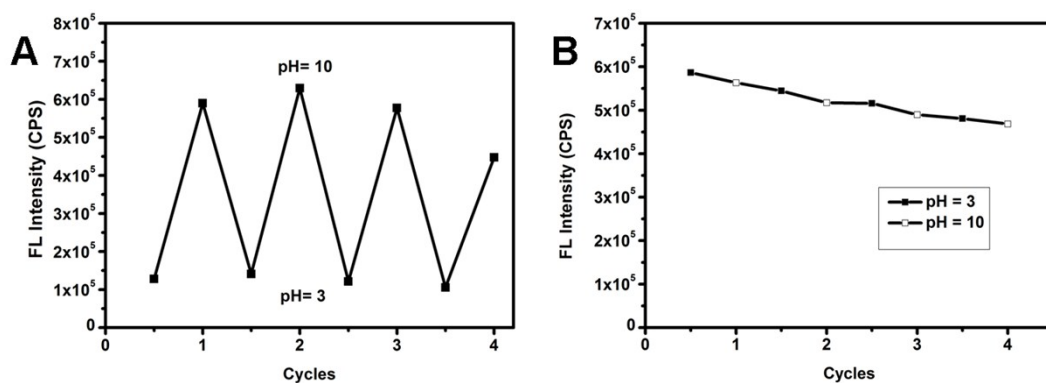

**Figure S3.** Cycling of fluorescence maxima of (A) PDI-PAEMA; (B) Fe<sub>3</sub>O<sub>4</sub>/PDI-PAEMA@SiO<sub>2</sub> NPs between pH = 3 and pH = 10.

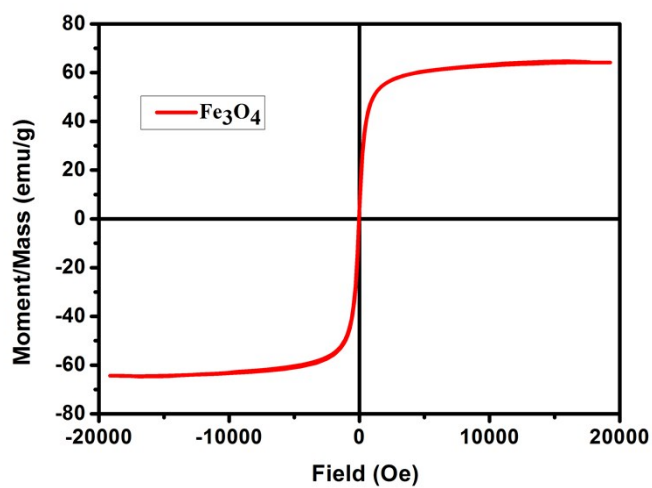

**Figure S4.** Field-dependent magnetization of Fe<sub>3</sub>O<sub>4</sub> NPs.
